# Supplementary material for: Modulatory mechanisms of TARP γ8-selective AMPA receptor therapeutics
Source: PubMed Central journal article supplement (PMC10039940; doi:10.1038/s41467-023-37259-5), 2023-03-25
Supplement: 41467_2023_37259_MOESM1_ESM.pdf [file 41467_2023_37259_MOESM1_ESM.pdf]

1 **Supplementary Information**

2

3

4

5 **Modulatory mechanisms of TARP  $\gamma$ 8-selective AMPA receptor therapeutics**

6

7

8 Danyang Zhang, Remigijus Lape, Saher A. Shaikh, Bianka K. Kohegyi, Jake F. Watson,

9 Ondrej Cais, Terunaga Nakagawa, Ingo H. Greger

10

11

12

13

14

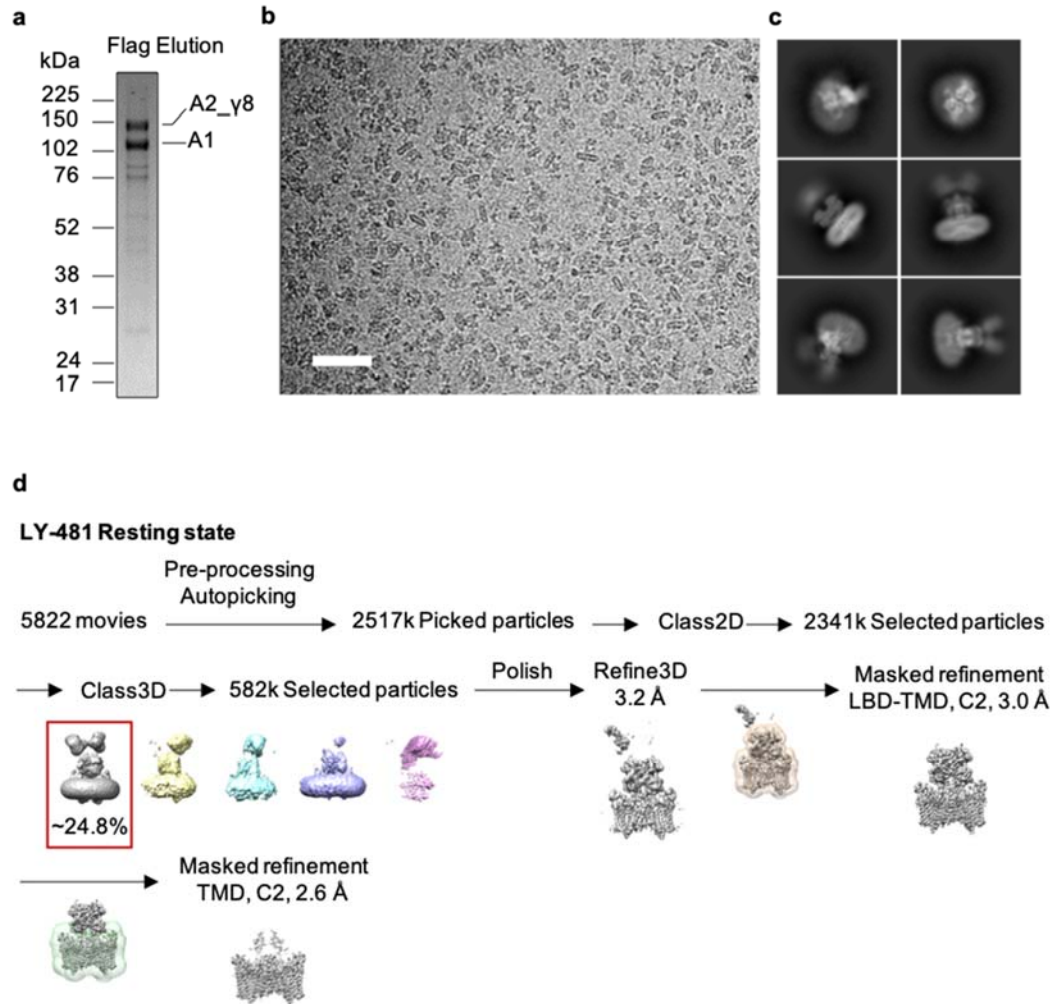

15

16

17 **Supplementary Fig. 1. Purification of recombinant AMPAR complex and representative**  
 18 **cryo-EM data processing workflow of GluA1/A2\_γ8 in complex with γ8 NAMs.**

19 **a**, Representative 4-12% Bis-Tris SDS-PAGE gel stained with Coomassie blue, indicating  
 20 elution of the GluA1/2\_γ8 complex from FLAG beads. Purification was performed  
 21 reproducibly (more than 3 times); uncropped gel provided at the end of Supplementary  
 22 Information. **b**, Representative, motion-corrected micrograph of resting-state GluA1/2\_γ8 in  
 23 complex with LY-481 among collected data (scale bar, 50 nm). **c**, Representative 2D class  
 24 averages of the resting state GluA1/2\_γ8 in complex with LY-481. **d**, Cryo-EM data processing  
 25 workflow of the resting state GluA1/2\_γ8 in complex with LY-481. Raw movies were first

26 processed, then more than 2 million raw particles were picked from motion-corrected  
27 micrographs. Then 2D and 3D classification was performed to remove bad particles, and finally  
28 582k particles were selected and polished for refinement. Next, focused refinement on LBD-  
29 TMD gating core was performed with C2 symmetry. To further improve the resolution at the  
30 ligand-binding pocket, the TMD sector alone was refined with C2 symmetry applied. This  
31 workflow was also implemented for the other structures (JNJ-118, JNJ-059).

32

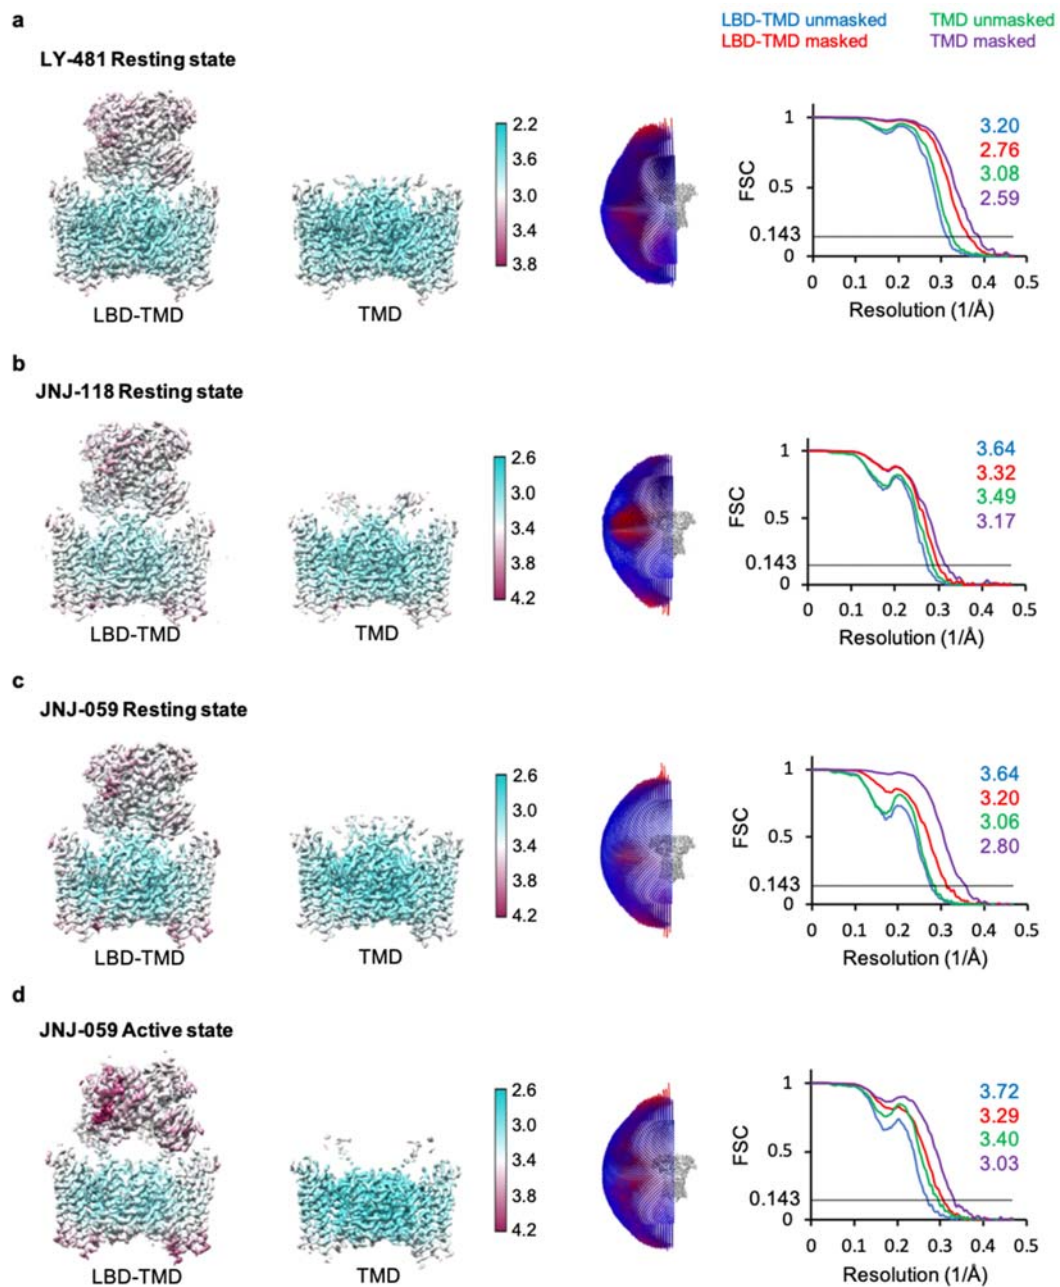

34

35

36 **Supplementary Fig. 2. Cryo-EM analysis of GluA1/A2\_γ8 in complex with γ8 NAMs.**

37 **a, Left:** Local resolution maps at LBD-TMD and TMD of resting state GluA1/A2\_γ8 in  
 38 complex with LY481. 3D maps are coloured based on local resolution estimate. **Middle:**  
 39 Euler angle distribution of particles used for the cryo-EM reconstruction. **Right:** Masked (red, LBD-

40 TMD and purple, TMD) or unmasked (blue, LBD-TMD and green, TMD) Fourier shell  
41 correlation (FSC) of corresponding maps where FSC=0.143 (black line). **b**, Local resolution  
42 maps, particle Euler angle distribution and FSC curves of resting state GluA1/A2\_γ8 in  
43 complex with JNJ-118. Figures are coloured as in A. **c**, Local resolution maps, particle Euler  
44 angle distribution and FSC curves of resting state GluA1/A2\_γ8 in complex with JNJ-059.  
45 Figures are coloured as in A. **d**, Local resolution maps, particle Euler angle distribution and  
46 FSC curves of open state GluA1/A2\_γ8 in complex with JNJ-059. Figures are coloured as in  
47 panel A.  
48

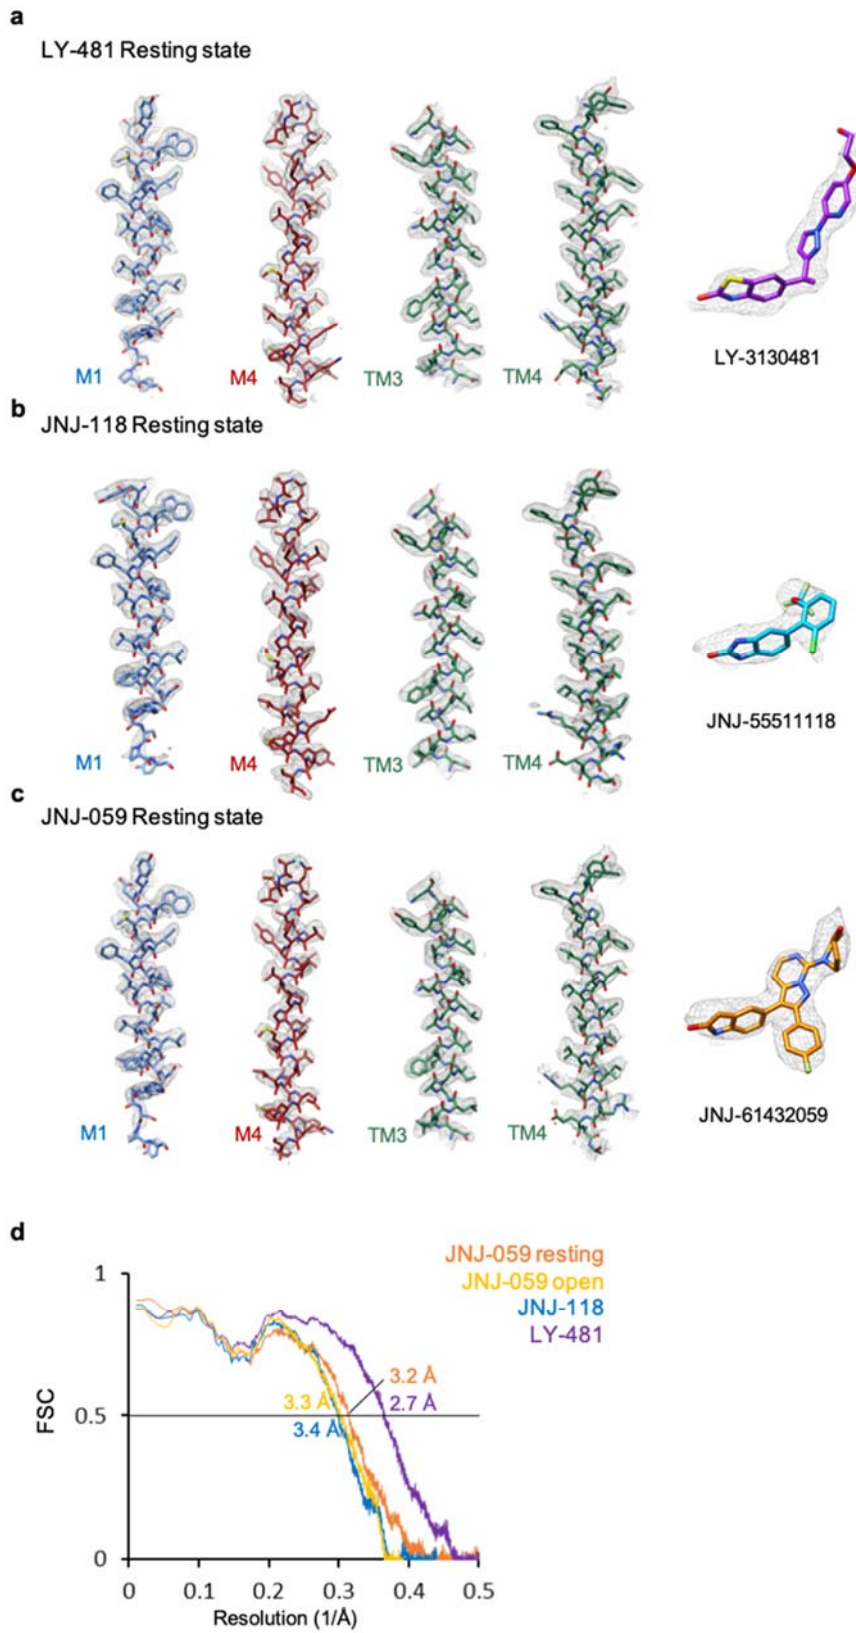

51

52 **Supplementary Fig. 3. Densities and their fit against models of GluA1/A2\_γ8**  
53 **transmembrane helices.**

54 **a**, Densities of LY-481 and surrounding transmembrane helices M1(GluA1), M4(GluA2),  
55 M3(γ8), M4(γ8) and their fit against the model. **b**, Densities of JNJ-118 and surrounding  
56 transmembrane helices M1(GluA1), M4(GluA2), M3(γ8), M4(γ8) and their fit against the  
57 model. **c**, Densities of JNJ-059 and surrounding transmembrane helices M1(GluA1),  
58 M4(GluA2), M3(γ8), M4(γ8) and their fit against the model. **d**, Model-to-map FSCs of ligand-  
59 bound GluA1/2\_γ8 LBD-TMD models in resting and active states.

60

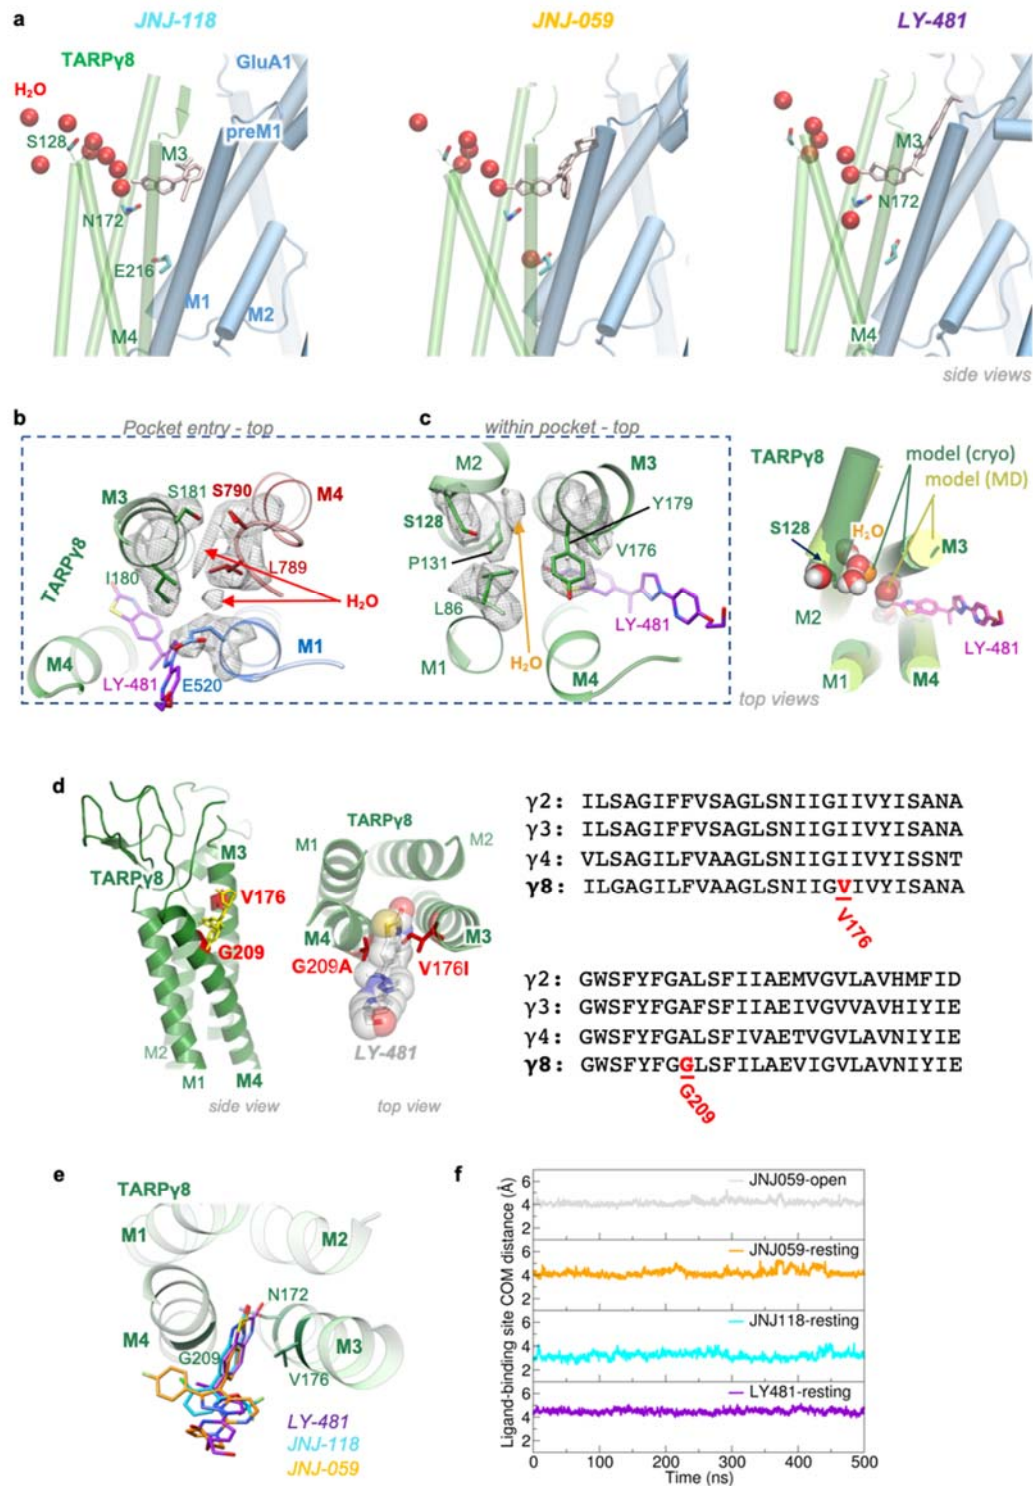

61

62

63 **Supplementary Fig. 4. Features of the NAM binding sites from cryo-EM and MD**

64 **simulation analysis.**



65 **a**, Snapshots from MD simulations (left: JNJ-118, centre, JNJ-059, right: LY-481) showing  
66 water molecules from the extracellular side penetrating into TARP in the direction of S128 to  
67 N172 at the ligand binding site. **b**, Density of putative waters (indicated by the red arrow) and  
68 surrounding residues in the LY-481 cryo-EM map around GluA2 S790. Model is coloured as  
69 in Fig2. **c**, Left: Density of putative waters (indicated by the red arrows) and surrounding  
70 residues in the LY-481 cryo-EM map around  $\gamma$ 8 S128. Model is coloured as in Fig2. Right:  
71 Top view of MD simulation snapshot showing water penetration into TARP in the LY-481  
72 complex, in the S128 to N172 region. **d**, Sequence alignment of Type 1 TARPs,  $\gamma$ 8-specific  
73 V176 and G209 are highlighted. The model demonstrates how these residues accommodate the  
74 ligands, in contrast with the bulkier residues of the other TARPs, shown in the top view in red.  
75 **e**, Overlay of resting state LY-481, JNJ-118 and JNJ-059 models. Models are coloured as in  
76 Fig2. **f**, Ligand stability in the binding site, measured as the centre of mass (COM) distance of  
77 ligand heavy atoms from COM of C $\alpha$  of binding site residues, V176, G209, M523 and C524.  
78 Representative variations from one binding site in one simulation set for each system are  
79 shown. Low variation indicates the ligands remain bound in the site during simulations.  
80

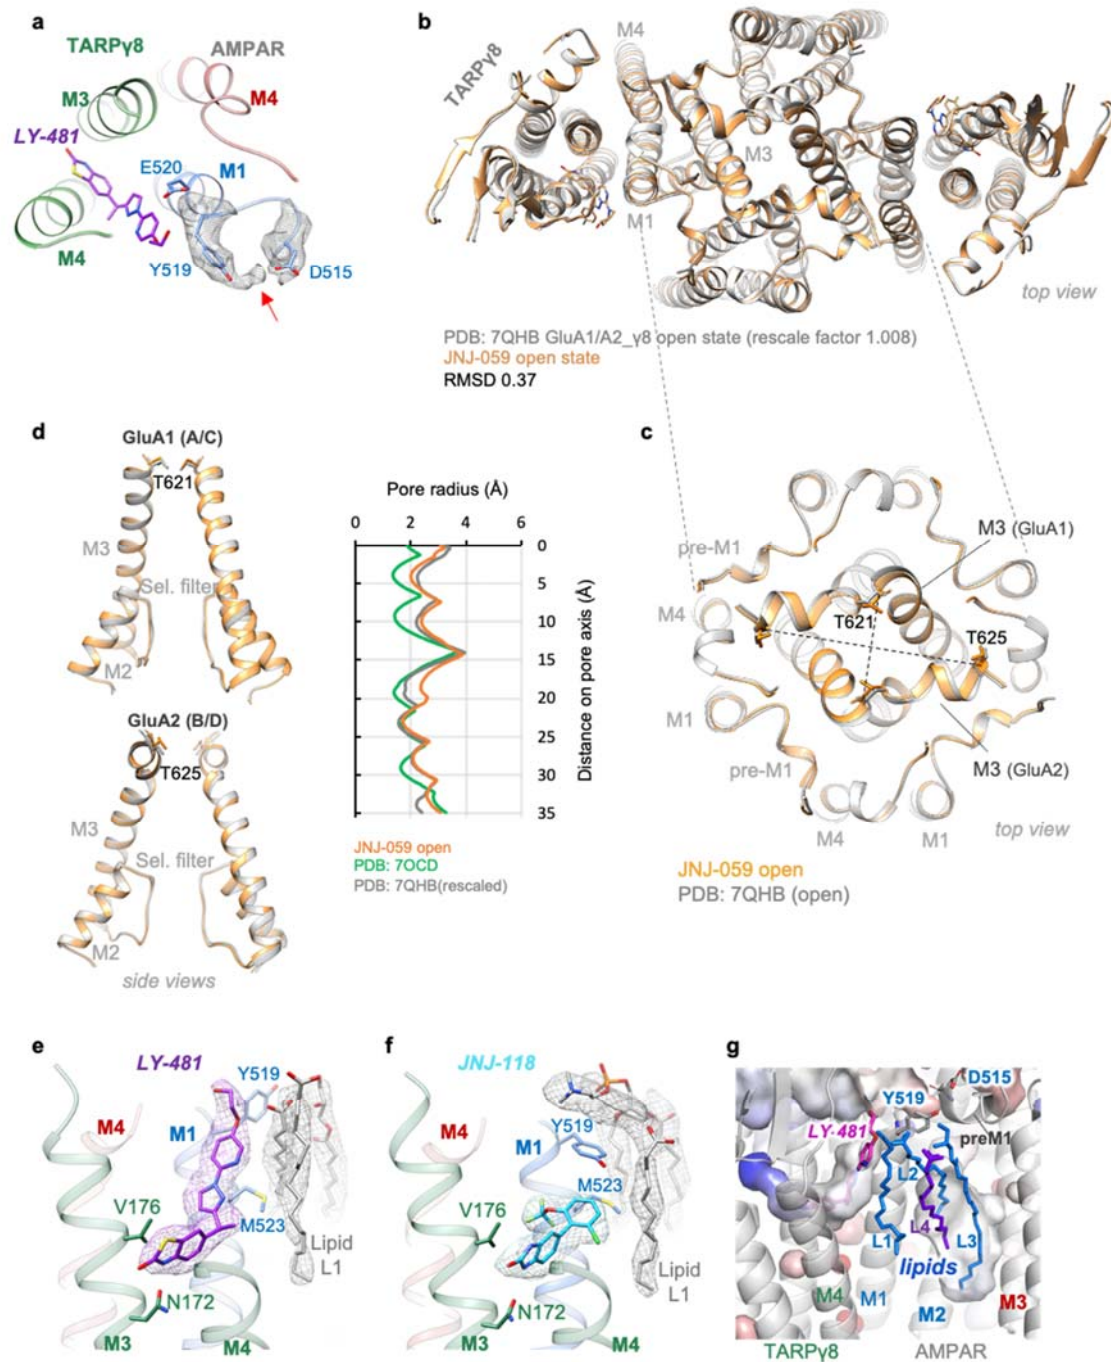

81

82

83 **Supplementary Fig. 5. JNJ-059 open state and annular lipids.**

84 **a**, Density of putative water that bridges Y519 and D515 in the LY-481 cryo-EM map. Model

85 is coloured as in Fig2. **b**, Superposition of open state GluA1/A2\_γ8 in complex with JNJ-059

86 (orange) and the open state GluA1/A2\_γ8 without ligand binding (PDB 7QHB; the model was

87 rescaled by a factor of 1.008 to eliminate systematic errors caused by pixel size calibration  
88 yielding better comparability). **c**, Zoomed-in view of the superposed models shows subtle  
89 changes at the receptor gate with JNJ-059 bound. **d**, Pore dimensions of resting state  
90 GluA1/A2\_γ8 (green, PDB 7OCD) open state GluA1/A2\_γ8 (grey, rescaled 7QHB as in panel  
91 B), and open state GluA1/A2\_γ8 in complex with JNJ-059 (orange) depicted by space-filling  
92 representation. Side views of superposed M3 helices (top: GluA1, bottom: GluA2) from open  
93 state models are shown. **e**, Density of LY-481 and the lipid molecules surround ligand-binding  
94 pocket. Model is coloured as in Figure2. **f**, Density of JNJ-118 and lipid molecules surround  
95 the ligand binding pocket. Model is coloured as in Fig2. **g**, Cavities of the NAM (LY-481  
96 serves as example) and annular lipids lining the conduction path helices (M2 and M3).  
97

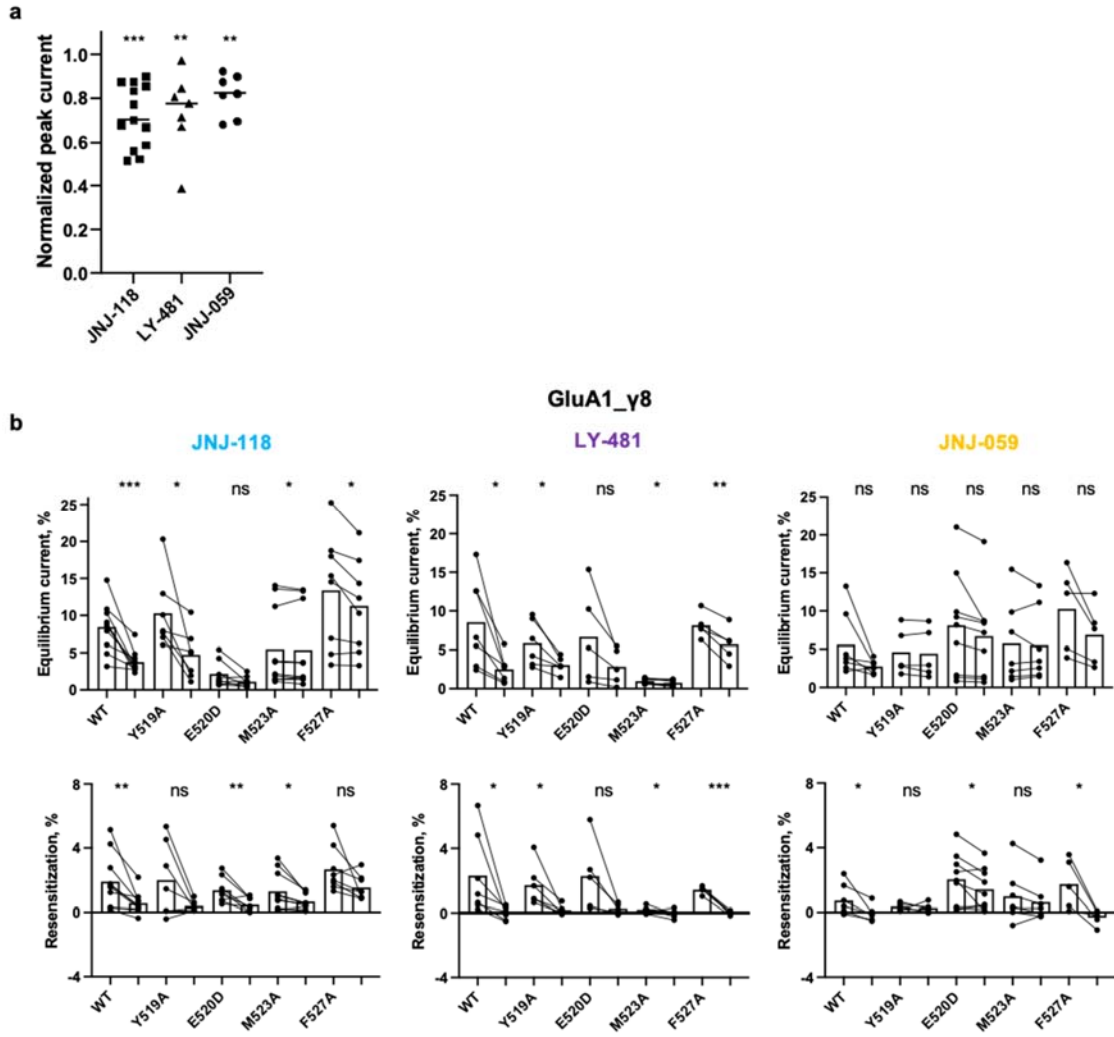

98

99

100 **Supplementary Fig. 6. Electrophysiological characterisation of GluA1 wt and mutants in**  
 101 **response to the three NAMs.**

102 **a**, Pooled scatter plot of GluA1<sub>i</sub>γ8 current peak inhibition by three modulators. Each point is  
 103 current peak in the presence of modulator normalized to the control peak. Horizontal lines  
 104 indicate the mean values. Asterisks summarize two-tailed one-sample t-test (difference from  
 105 100%) results: \*\*  $p \leq 0.01$ , \*\*\*  $p \leq 0.001$ . Number of cells:  $n=13, 7,$  and  $7$  for JNJ-118, LY-  
 106 481, and JNJ-059, respectively. **b**, Paired bar plots showing effect of  $10 \mu\text{M}$  JNJ-118, LY-481  
 107 or JNJ-059 on equilibrium current and resensitization for wild-type or mutant GluA1<sub>i</sub>γ8. Each  
 108 point is a measure of parameter in absence or presence of modulator. Bar height represents the

109 mean value. Asterisks indicate summary of two-tailed paired t-test values: \*  $p \leq 0.05$ , \*\*  $p$   
110  $\leq 0.01$ , \*\*\*  $p \leq 0.001$  and 'ns' for  $p > 0.05$ . Number of cells: JNJ-118: n=10, 7, 8, 10, and 8;  
111 LY-481: n=7, 6, 5, 8, and 5; JNJ-059: n=7, 5, 9, 7, and 5 for wt, Y519A, E520D, M523A, and  
112 F527A, respectively. Source data are provided as a Source Data file.  
113

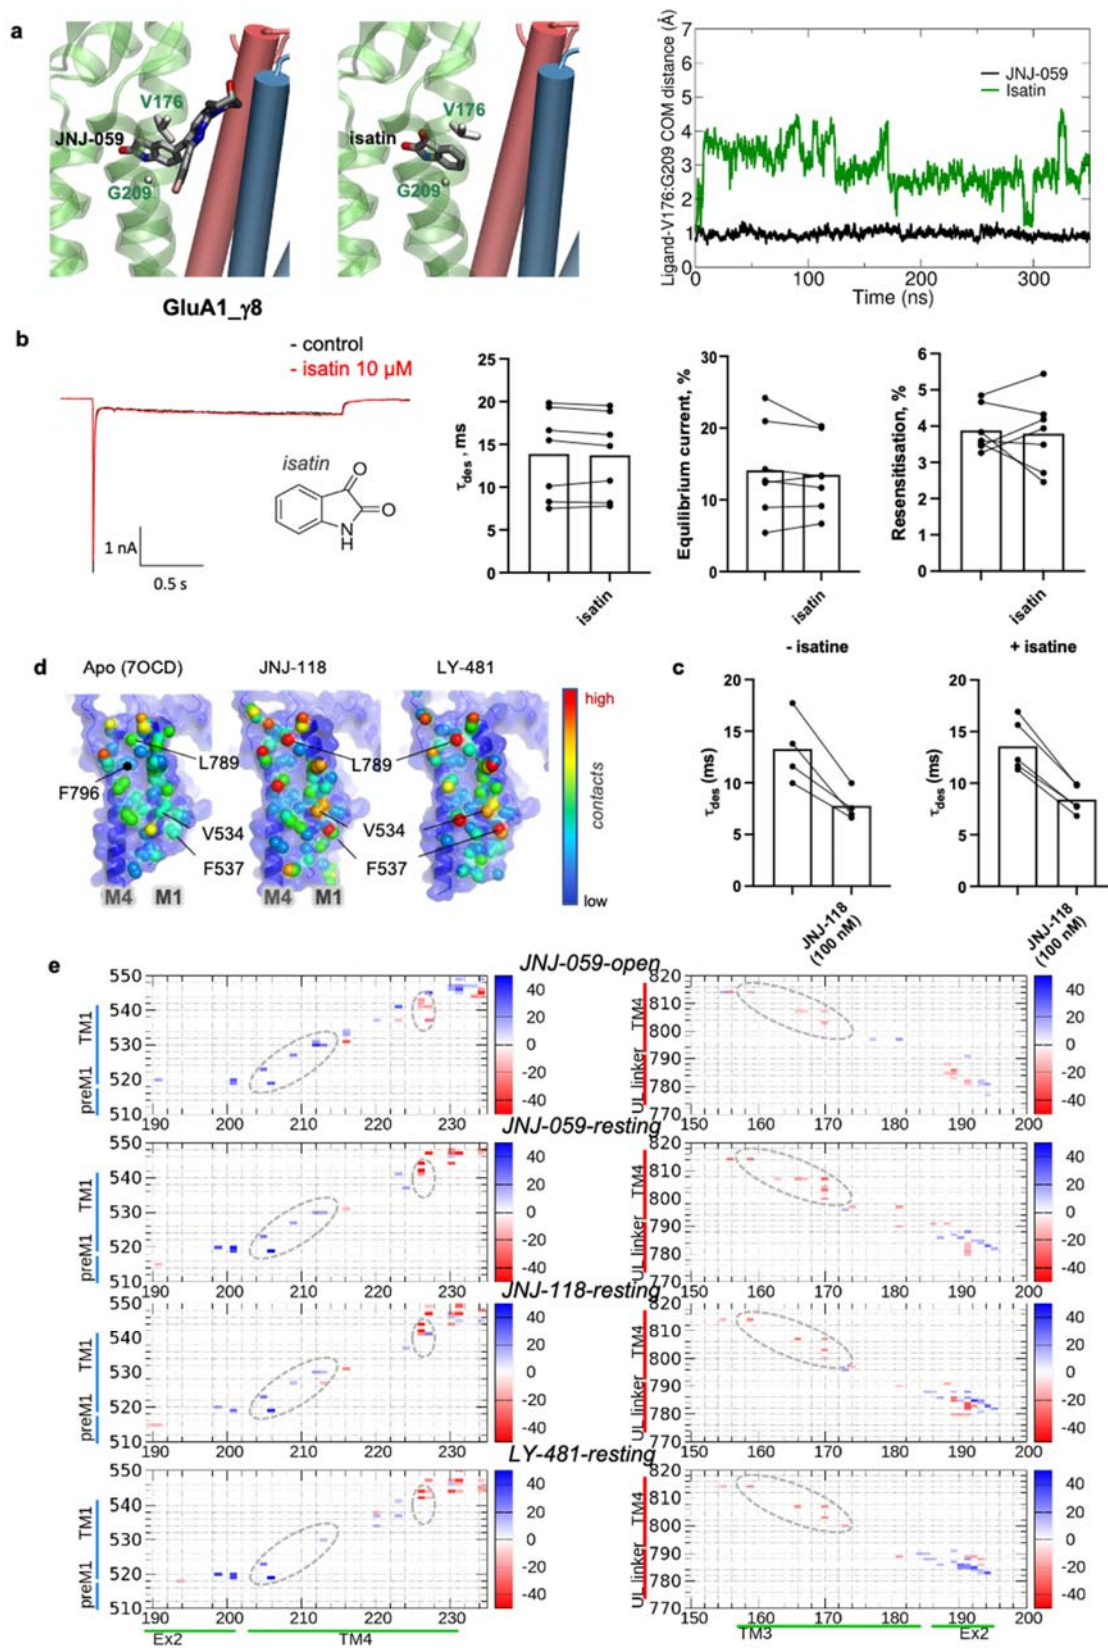

116

117 **Supplementary Fig. 7. Role of natural oxindoles and contact map analyses.**

118 **a**, MD snapshots after initial equilibration runs (before production runs) showing the  
119 positioning of JNJ-059 (left) and isatin (centre) in the TARP binding site, with the  
120 oxindole/isatin sandwiched between V176 and G209. Oxindole/isatin stability in the binding  
121 site, measured as the centre of mass (COM) distance of oxindole group heavy atoms, from  
122 COM of C $\alpha$  of V176 and G209. **b, Left:** Representative whole-cell responses to 10 mM  
123 glutamate (2 seconds, -60 mV) from HEK293T cells transfected with GluA1i\_ $\gamma$ 8 tandem in  
124 control condition (black) and in presence of isatin 10  $\mu$ M (red). **Right:** Paired bar plots showing  
125 effect of 10  $\mu$ M isatin on desensitization  $\tau$ , equilibrium current and resensitization for  
126 GluA1i\_ $\gamma$ 8. Each point is a measure of parameter in absence or presence of isatin. Bar height  
127 represents the mean value (n = 7). Two-tailed paired t-test *p* values for all parameters were  
128 *p*>0.05. **c**, Paired bar plots showing effect of 100 nM JNJ-118 on GluA1i\_ $\gamma$ 8 desensitization  $\tau$   
129 in absence or presence of 1 mM isatin. Bar height represents the mean value (n = 4 and 5,  
130 respectively). **d**, TARP  $\gamma$ 8 contact points along its binding site, the M4<sub>GluA2</sub> and M1<sub>GluA1</sub>  
131 helices. Contacted residues are coloured depending on the number of atoms contributing to the  
132 interaction (red: high; blue: low). Contacts were computed using 'findNeighbors' in ProDy'  
133 with a 4.5 Å cutoff between heavy atoms (Bakan et al., 2011). **e**, Contact-difference maps (see  
134 Methods) for GluA1-TARP (left panel) and GluA2-TARP (right panel) from simulations.  
135 Positive values (blue) indicate contacts that are longer lived in apo vs. ligand-bound states,  
136 negative values (red) show contacts that are more persistent in ligand-bound systems compared  
137 to apo. Dotted ovals highlight the main changes in interfacial contacts from apo to ligand-  
138 bound states: ligand binding reduced TARP contact with GluA1 M1 in the top half (blue  
139 contacts in oval), but increased contact near the helix base (red contacts in oval). For GluA2

140 M4, ligand binding induces an overall increase in contact with TARP (red contacts in oval).

141 Source data are provided as a Source Data file.

142





151 way ANOVA test with Dunnett correction was used for multiple comparisons to wild type  
152 receptor (\*  $p \leq 0.05$ , \*\*  $p \leq 0.01$ , \*\*\*  $p \leq 0.001$  and 'ns' for  $p > 0.05$ ; n values same as in  
153 Fig. 5d). **b**, Paired bar plots showing effect of 10  $\mu\text{M}$  JNJ-118, LY-481 or JNJ-059 on  
154 desensitization  $\tau$ , equilibrium current and resensitization for wild type or mutated (R541A or  
155 F542A) GluA1i $_{\gamma 8}$ . Each point is a measure of parameter in absence or presence of modulator.  
156 Bar height represents the mean value. Asterisks indicate summary of two-tailed paired t-test  
157 values: \*  $p \leq 0.05$ , \*\*  $p \leq 0.01$ , \*\*\*  $p \leq 0.001$  and 'ns' for  $p > 0.05$ ; number of cells: JNJ-  
158 118: 8, 6, 5 (for WT, R541A, and F542A, respectively); LY-481: 7, 11, 9; JNJ-059: 7, 7, 7.  
159 Greyed out data sets have been presented elsewhere in this paper (Fig. 4b, Fig. S6b). Source  
160 data are provided as a Source Data file.  
161

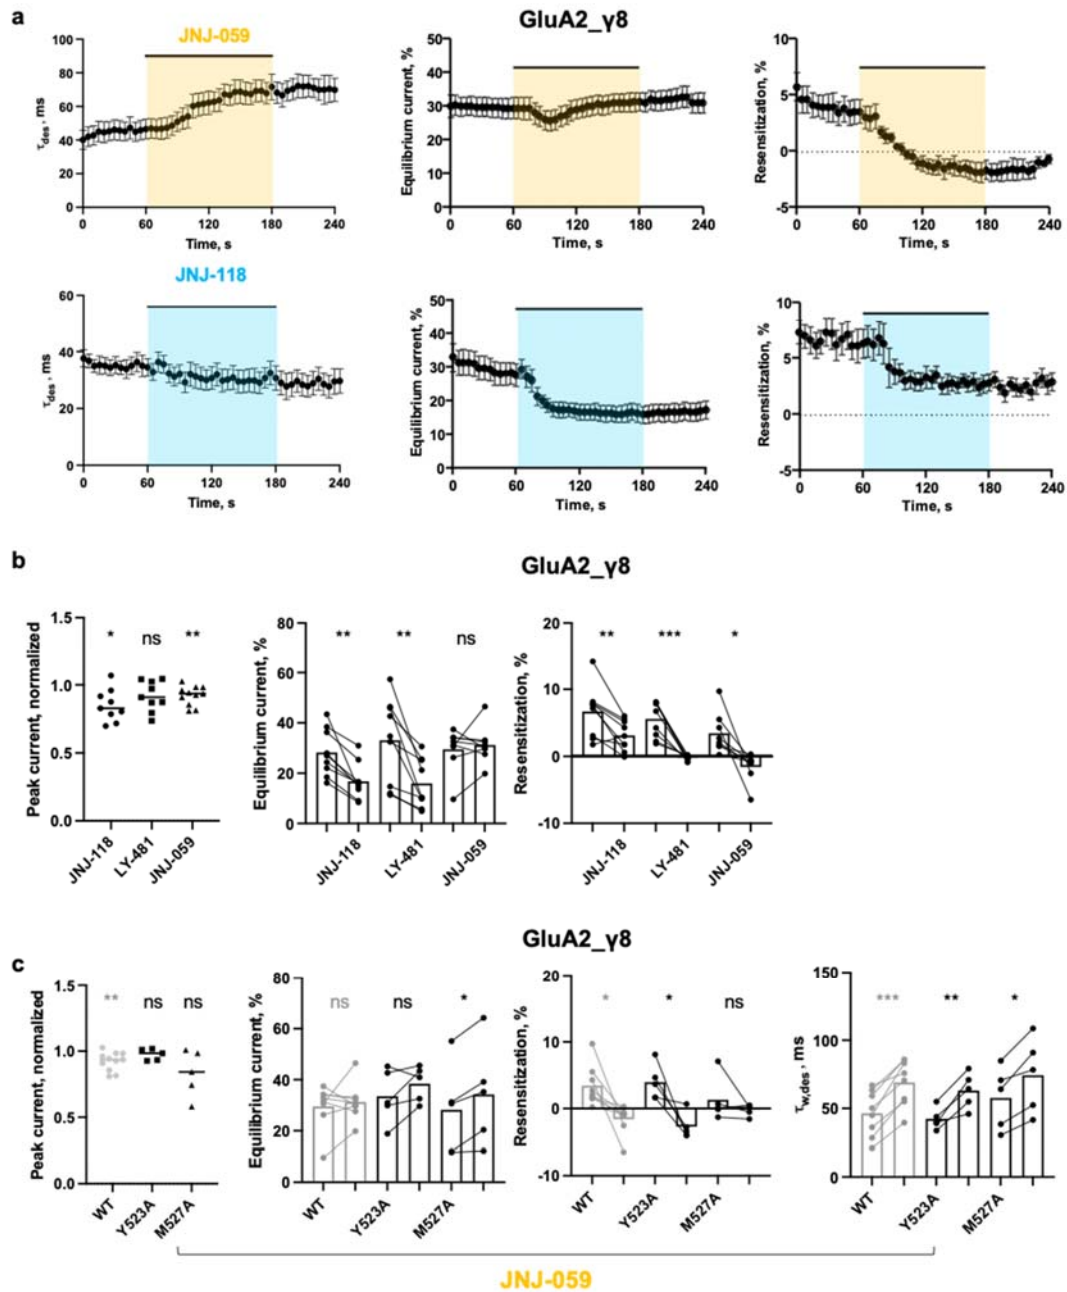

162

163

164 **Supplementary Fig. 9. Electrophysiological analysis of GluA2 mutants in response to the**  
 165 **three NAMs.**

166 **a**, Scatter plot of average desensitization  $\tau$  (left), equilibrium current (middle) and

167 resensitization (right) in time indicating the time-course of JNJ-059 (n=8; top) or JNJ-118 (n=9;

168 bottom) effect on wild-type GluA2 $\gamma$ 8 receptor currents. Black circles and whiskers indicate

169 mean values and standard error. **b, Left:** Pooled scatter plot of GluA2iQ\_γ8 current peak  
170 inhibition by three modulators. Each point is current peak in the presence of modulator  
171 normalized to the control peak. Horizontal lines indicate the mean values (n = 9, 9, and 11 for  
172 JNJ-118, LY-481, and JNJ-059, respectively). Asterisks summarize two-tailed one-sample t-  
173 test (difference from 100%) results: \*  $p \leq 0.05$ , \*\*  $p \leq 0.01$ . **Right:** Paired plots showing  
174 effect of 10 μM JNJ-118, LY-481 or JNJ-059 on equilibrium current and resensitization for  
175 GluA2iQ\_γ8. Bar height represents the mean value (n = 9, 9, and 8 for JNJ-118, LY-481, and  
176 JNJ-059, respectively). **c, Left:** Pooled scatter plot of wild type or mutant GluA2iQ\_γ8 current  
177 peak inhibition by JNJ-059. Each point is current peak in the presence of JNJ-059 normalized  
178 to the control peak. Horizontal lines indicate the mean values (n = 11, 5, and 5 for WT, Y523A,  
179 and M527A, respectively). Asterisks summarize two-tailed one-sample t-test (difference from  
180 100%) results: \*\*  $p \leq 0.01$  **Right:** Paired plots showing effect of JNJ-059 on equilibrium  
181 current, resensitization, and desensitization  $\tau$  for GluA2iQ\_γ8. Bar height represents the mean  
182 value (n = 8, 5, and 5 for WT, Y523A, and M527A, respectively). Asterisks indicate summary  
183 of one-sample t-test (difference from 1; normalized peak) or two-tailed paired t-test values  
184 (paired plots): \*  $p \leq 0.05$ , \*\*  $p \leq 0.01$ , \*\*\*  $p \leq 0.001$  and 'ns' for  $p > 0.05$ . Greyed out data  
185 sets are repeated from **b** and Fig. 6b. Source data are provided as a Source Data file.  
186  
187

188 **Supplementary Table 1.**

189

190 **Cryo-EM data collection, refinement and validation statistics.**

191

|                                           | A1/2_γ8 + LY-481 | A1/2_γ8 + JNJ-118 | A1/2_γ8 + JNJ-059 | A1/2_γ8 + JNJ-059 |
|-------------------------------------------|------------------|-------------------|-------------------|-------------------|
|                                           | Resting state    | Resting state     | Resting state     | Open state        |
|                                           | LBD-TMD          | LBD-TMD           | LBD-TMD           | LBD-TMD           |
|                                           | (EMDB-15717)     | (EMDB-15716)      | (EMDB-15714)      | (EMDB-15718)      |
|                                           | (PDB 8AYN)       | (PDB 8AYM)        | (PDB 8AYL)        | (PDB 8AYO)        |
| <b>Data collection and processing</b>     |                  |                   |                   |                   |
| Microscope                                | FEI Titan Krios  | FEI Titan Krios   | FEI Titan Krios   | FEI Titan Krios   |
| Detector                                  | K3 + GIF         | K3 + GIF          | K3 + GIF          | K3 + GIF          |
| Magnification                             | 81000X           | 81000X            | 81000X            | 81000X            |
| Voltage (kV)                              | 300              | 300               | 300               | 300               |
| Electron exposure<br>(e-/Å <sup>2</sup> ) | 50               | 50                | 50                | 50                |
| Defocus range (μm)                        | -1.2 to -2.8     | -1.2 to -2.8      | -1.2 to -2.8      | -1.2 to -2.8      |
| Pixel size (Å/pixel)                      | 1.07             | 1.07              | 1.07              | 1.07              |
| Symmetry imposed                          | C2               | C2                | C2                | C2                |
| Micrographs                               | 5822             | 4019              | 3781              | 13612             |
| Map resolution (Å)                        | 2.8              | 3.3               | 3.2               | 3.3               |
| FSC threshold                             | 0.143            | 0.143             | 0.143             | 0.143             |
| <b>Refinement</b>                         |                  |                   |                   |                   |
| Initial model used<br>(PDB)               | 7OCD             | 7OCD              | 7OCD              | 7OCD              |
| Model resolution (Å)                      | 2.8              | 3.3               | 3.2               | 3.3               |

|                                            |                  |                   |                   |                    |
|--------------------------------------------|------------------|-------------------|-------------------|--------------------|
| FSC threshold                              | 0.5              | 0.5               | 0.5               | 0.5                |
| Map sharpening B factor ( $\text{\AA}^2$ ) | -90              | -104              | -88               | -106               |
| Model composition                          |                  |                   |                   |                    |
| Non-hydrogen atoms                         | 15748            | 15962             | 15702             | 14512              |
| Protein residues                           | 1998             | 2008              | 1998              | 1962               |
| Ligands                                    | LY-481: 2, ZK: 4 | JNJ-118: 2, ZK: 4 | JNJ-059: 2, ZK: 4 | JNJ-059: 2, CTZ: 4 |
| Lipids                                     | 22               | 22                | 18                | 16                 |
| B factors ( $\text{\AA}^2$ )               |                  |                   |                   |                    |
| Protein                                    | 45.86            | 34.91             | 52.15             | 50.23              |
| Ligand                                     | 23.32            | 17.75             | 33.71             | 36.84              |
| R.m.s. deviations                          |                  |                   |                   |                    |
| Bond lengths ( $\text{\AA}$ )              | 0.008            | 0.006             | 0.007             | 0.007              |
| Bond angles                                | 0.646            | 0.796             | 0.608             | 0.583              |
| Validation                                 |                  |                   |                   |                    |
| Molprobity score                           | 1.56             | 1.01              | 1.61              | 1.40               |
| Clashscore                                 | 5.41             | 1.59              | 5.82              | 6.56               |
| Poor rotamers (%)                          | 0                | 0.13              | 0                 | 0                  |
| Ramachandran plot                          |                  |                   |                   |                    |
| Favoured (%)                               | 96.08            | 97.47             | 95.83             | 97.81              |
| Allowed (%)                                | 3.92             | 2.53              | 4.17              | 2.19               |
| Disallowed (%)                             | 0                | 0                 | 0                 | 0                  |

---

192

193

194 **Uncropped version of the gel presented in Supplementary Fig. 1:**

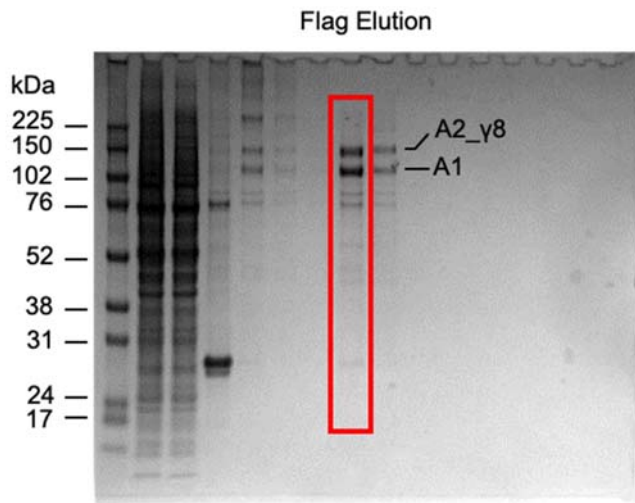

195
