# Supplementary material for: Modulatory mechanisms of TARP γ8-selective AMPA receptor therapeutics
Source: PubMed Central journal article supplement (PMC10039940; doi:10.1038/s41467-023-37259-5), 2023-03-25
Supplement: 41467_2023_37259_MOESM2_ESM.pdf [file 41467_2023_37259_MOESM2_ESM.pdf]

### Description of Additional Supplementary Files

File Name: Supplementary Movie 1

Description: **Cryo-EM map of the LY-481 resting state GluA1/2\_γ8 complex, outlining the NAM binding pocket (side and front views).** Colour code: GluA1-blue, GluA2-red, TARP γ8- green, LY-481-purple, lipids-grey, ligand coordinating side chains are shown in stick.

File Name: Supplementary Movie 2

Description: **All-atom MD simulation of the LY-481 resting state GluA1/2\_γ8 complex.** Colour code: GluA1-blue, GluA2-red, TARP γ8-green, LY-481-yellow (spheres).
